# Supplementary material
Source: publisher site journal article supplement (https://www.dovepress.com/article/363693)
Supplement: Supplementary file 1 [file get_supplementary_file.php]

***Supplementary material and methods***

Cell culture and experimental design

Human umbilical veins were treated with 1% collagenase (Life Technologies, Carlsbad, CA, USA) to obtain HUVEC and were cultured in specific growth medium EGM-2 (Lonza, Cultek, Barcelona, Spain). The umbilical cords from neonates to obtain HUVEC were obtained following the principles outlined in the Declaration of Helsinki, approved by the Ethical Committee of Clinical Research of the Hospital Clínico Universitario of Valencia (HCUV, Spain). The HUVECs herein employed had 3-6 passages. Cells were cultured in culture medium 199 with Earle's Balanced Salt Solution and L-Glutamine (Lonza, Verviers, Belgium), supplemented with 20% foetal bovine serum (FBS) (Invitrogen, San Diego, CA, USA), 1% penicillin / amphotericin (Invitrogen, San Diego, CA, USA) and growth factors (Sigma-Aldrich, Missouri, USA). HUVEC cells were incubated at 37°C in a Heracell 150i CO2 incubator (Thermo Scientific, New York, NY, USA) in a humidified atmosphere (5% CO2).

Histone extraction and purification

Histones were purified using the protocol described by Shechter et al., 2007, with some modifications (Supplementary Figure 2). Cells were washed with PBS and the dry pellet was resuspended in Hypotonic Lysis Buffer (10 mM Tris-HCl pH = 8, 1 mM KCl, 1.5 mM MgCl2) with 10 μL / mL of orthovanadate, and 2 μL / mL of proteases inhibitor (Fisher Scientific, Hampton, USA). Afterwards, cells were kept in rotation 30 minutes at 4ºC and then were centrifuged 10 minutes at 4ºC at 10,000 rpm. Finally, the pellet was resuspended in 400 μL of 0.4N of H2SO4 and was kept in rotation overnight at 4 °C. The next day the sample was centrifuged 10 minutes at 4 °C at 13,000 rpm. The supernatant was kept. The following step was to add 132 μL of 100% tricarboxylic acid to the sample and incubate on ice 30 minutes. Then, the sample was centrifuged 10 minutes at 4ºC at 13,000 rpm and the pellet was washed with 0.5mL ice-cold acetone. Finally, the sample was centrifuged 10 minutes at 13,000 rpm at 4ºC and the pellet was resuspended in H2O.

Cell viability and apoptosis determination

Cells were recovered together with the medium. Cells and medium were resuspended in Annexin-V buffer and stained with Annexin-V FITC and propidium iodide (PI) for 15 min in the dark. The stained cells were analyzed by flow cytometry in a FACS-Verse cytometer (Beckton Dickinson, San Jose, CA, USA). Cell viability, apoptosis, and necrosis were determined by the Infinicyt software (Cytognos, Santa Marta de Tormes, Salamanca, Spain).

Oxyblot and Western blot

Protein carbonyls were measured using the OxyBlot™ protein oxidation detection kit (Merck Millipore, Burlington, Massachusetts, USA) following the manufacturer’s specifications.

Firstly, 5 μg of proteins were incubated with 2,4-dinitrophenylhydrazine to form the 2,4-dinitrophenyl (DNP) hydrazine derivatives. Proteins were separated in SDS-PAGE and blotted onto nitrocellulose membranes (Whatman GmbH, Dassel, Germany). The DNP-containing proteins were detected using rabbit anti-DNP antiserum (1:500) and goat anti-rabbit IgG conjugated to horseradish peroxidase (HRP) (1:2000). Development was performed using peroxidase-linked secondary antibodies (Santa Cruz Biotechnology, Dallas, TX, USA). Luminol (ECL Western Blotting Detection Reagents, GE Healthcare, Hatfield, and Hertfordshire, UK) was added to the membrane. Membranes were revealed by an image reader LAS-4000 (GE Healthcare, Uppsala, Sweden). Signal density was analyzed with the ImageJ software (NIH Image, National Institutes of Health, Bethesda, MD, USA).

To determine protein relative levels, WB was performed: 5 μg of proteins were denatured using the sample buffer (Tris 40mM, EDTA, bromophenol blue 0,01%, sucrose 40%, SDS 4%, β-mercaptoethanol 10%) and heated to 95°C for 5 minutes.

Proteins were separated by sodium dodecyl sulfate-polyacrylamide gel electrophoresis (SDS-PAGE) and blotted onto nitrocellulose membranes (Whatman GmbH, Dassel, Germany). The different proteins were incubated with specific primary antibodies and their corresponding secondary antibodies (see Supplementary Material and Methods for information on the primary and secondary antibodies). Luminol (ECL Western Blotting Detection Reagents, GE Healthcare, Hatfield, and Hertfordshire, UK) was added onto the membrane, and membranes were revealed by an image reader LAS-4000 (GE Healthcare, Uppsala, Sweden). Signal density was analyzed by the ImageJ software (NIH Image, National Institutes of Health, Bethesda, MD, USA).

Western blot antibodies

Primary specific antibodies: PRX-SO3 (Abcam, ab16830), PRX6 (Abcam, ab59543), GPX1 (Abcam, ab22604), Catalase (Sigma-Aldrich, c0979), MnSOD (Abcam, ab13533), Cu/ZnSOD (Abcam, ab13498) and eNOS (Santa Cruz Biotechnology, sc-653), COX-1 (Santa Cruz Biotechnology, sc-19998), COX-2 (Santa Cruz Biotechnology, sc-19999), PGIS (Santa Cruz Biotechnology, sc-20933), TXAS (Santa Cruz Biotechnology, sc-79181), Caspase-3 (Cell Signaling, 9662), NLRP3 (Novus, NBP2-12446). Finally, -actin (Sigm-Aldrich, a1978) (Sigma-Aldrich) as loading control.

Detection was performed using peroxidase-linked secondary antibodies (anti-mouse (Sigma-Aldrich, NA931V), anti-goat (Santa Cruz Biotechnology sc2020), anti-rabbit (Sigma-Aldrich, NA934V).

qRT-PCR primers and probes

PGIS-2 (Hs00919949_m1, Life Technologies), TBXAS (Hs01022706_m1, Life Technologies), NOS-3 (Hs01574665_m1, Life Technologies), V-CAM-1 (Hs01003372_m1, Life Technologies) I-CAM-1 (Hs00164932_m1, Life Technologies), SEL-E (Hs00174057_m1, Life Technologies), COX-1 (Hs00377726_m1, Life Technologies), COX-2 (Hs00153133_m1, Life Technologies), TRX-1 (Hs01555214_g1, Life Technologies), TRX-2 (Hs00429399_m1, Life Technologies), IL-1 (Hs00174092_m1, Life Technologies), IL-1 (Hs01555410_m1, Life Technologies), IL-6 (Hs00174131_m1, Life Technologies), IL-18 (Hs01038788_m1, Life Technologies) and GAPDH (Hs02758991_g1, Life Technologies).

Caspase-1 expression analysis

Caspase-1 activity was measured using the Caspase-Glo® 1 Reagent (Caspase-Glo® 1 Inflammasome, Promega, Madison, Wisconsin, USA) following the manufacturer’s specifications.

Briefly, 1:1 ratio of cell culture medium and Caspase-Glo® 1 Reagent previously prepared was mixed and incubated for 1 h at room temperature (RT). Next, luminosity was measured with Spectra max Gemini XPS (BioNova Científica, Madrid, Spain). To confirm that MG-132 inhibition and Ac-YVAD-CHO inhibition were complete, luminescence was measured at 60, 90 and 120 minutes. Data were acquired once having stabilized the signal when MG-132 inhibition and Ac-YVAD-CHO inhibition were complete using the SoftMax Pro 6.2.2 software.

Sample preparation for mass mass spectrometry analysis

Plasma samples were centrifuged 15min at 15000g for delipidation. 2μL of each plasma sample was diluted in 8 μL H2O. 2 μL of each 1/5 diluted plasma (25 μg) is mixed in 18 μL of 50mM BA together with 25 fmol of Heavy Mix peptides in a 20μL final volume. Cysteine residues were reduced by 2 mM DTT (DL-Dithiothreitol) in 50 mM ABC at 300 W microwave for 3 min. Sulfhydryl groups were alkylated with 5 mM IAM (iodoacetamide) in 50 mM ABC in the dark at r.t. for 20 min. The reaction was stopped with TFA (trifluoroacetic acid) at a final concentration of 1%.

Mass spectrometry analysis

The MRM experiments were performed in a 5500QTRAP hybrid triple quadrupole/linear ion trap mass spectrometer (ABSIEX), equipped with a Micro M3 MicroLC chromatographic system. 10 L of triptic digest (about 9ug of protein and 25fmol of each Spike-In peptide) was injected into a Trap column (10X0.3mm Trap Cartridge Chromxp C18CL 5um, ABSCIEX) and was then loaded and separated onto an analytical column (ChromXP C18, 120A, 3um, 150x0.3mm). Elution was carried out with a linear gradient of 0 a 35% B in A for 30min. (A: 0.1% FA; B: ACN, 0.1% FA) at a flow rate of 5μl/min.

The 5500 QTRAP was operated in a MRM mode. MRM data were acquired in the positive mode with a spray voltage of 5500 V, curtain gas: 25 psi, ion source gas: 25psi, entrance potential (EP):10 and exit potential (EXP): 16.

Collision energy (CE) and Declustering Potential (DP) were optimized previously by each transition.

Relative quantification of each histone was done and the area ratios (light/heavy) for all transitions, which were calculated using the Skyline 4.2.1.19058 software (MacCoss lab) and light concentration estimated as fmol/μL of initial serum and converted to ng/mL of protein.

The peptides used for the quantification of each protein are showed in Table 1.

Analysis of caspase-1 and cytokine levels mediated by inflammasome activation

These kits were made following the manufacturer’s directions. Briefly, 50 μL of diluted beads were added to each well and incubated for 15 min. Excess liquid was removed. Next 50 μL of each standard and 50 μL of citrate plasma from each patient were added and incubated overnight. The next day, the antibody was added and incubated with shaking for 30 min. Streptavidin was incubated for 30 min with shaking before analyzing the results with the reading buffer. After each aforementioned process, it was washed 3 times with washing buffer. The obtained data were quantified according to the standard curve prepared with the standards of each human cytokine.

**
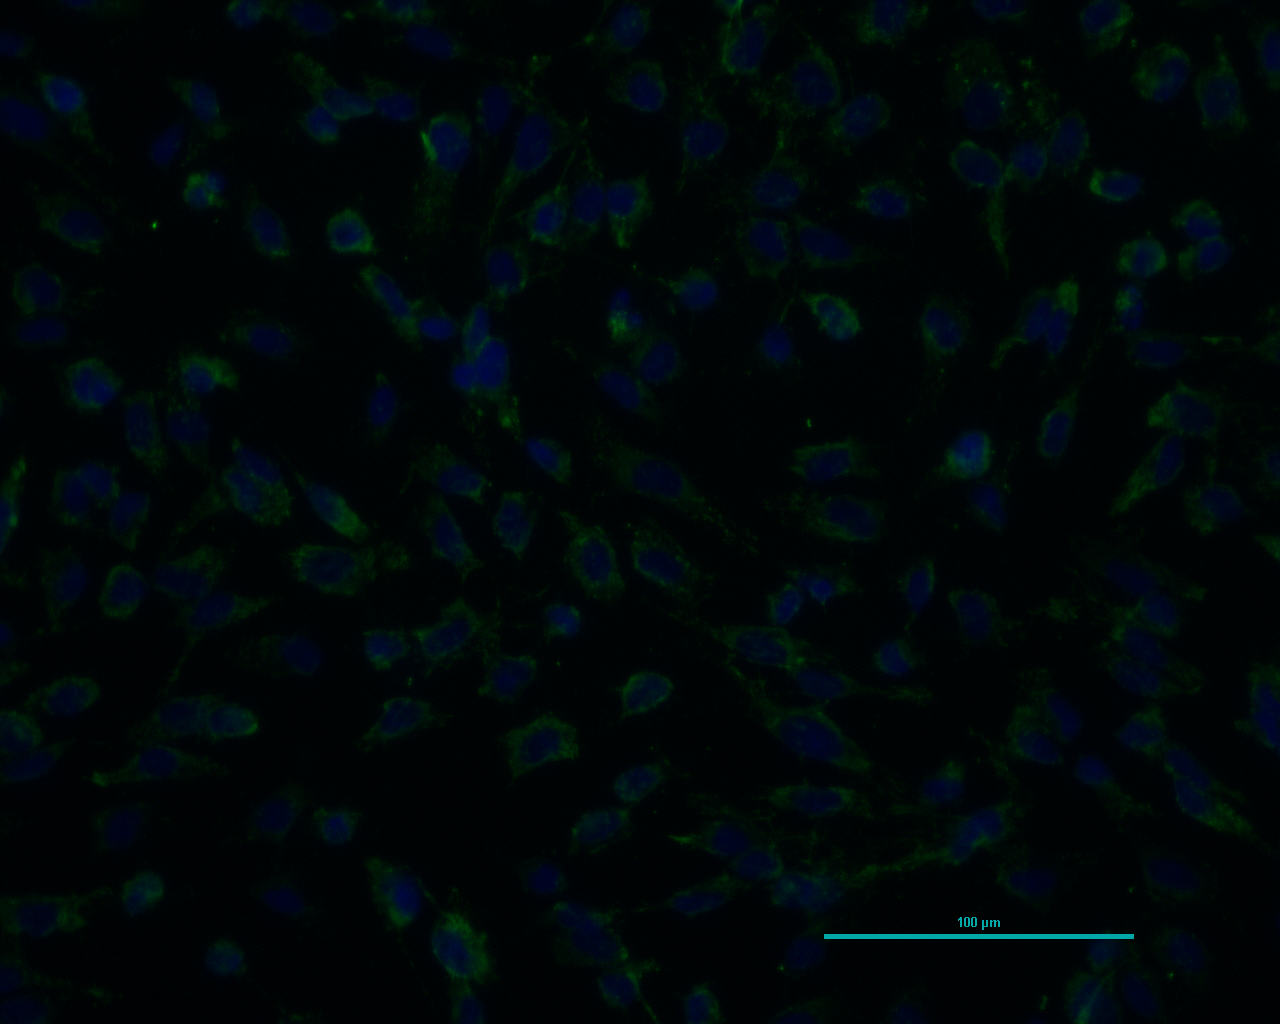
**

**Supplementary Figure 1.** Cultured HUVEC phenotypic characterization. Merged images of fluorescence microscopy of von Willebrand Factor expression (FITC(green)) and DAPI (blue) nuclei staining is shown. Scale bar represents 100 µm.

**
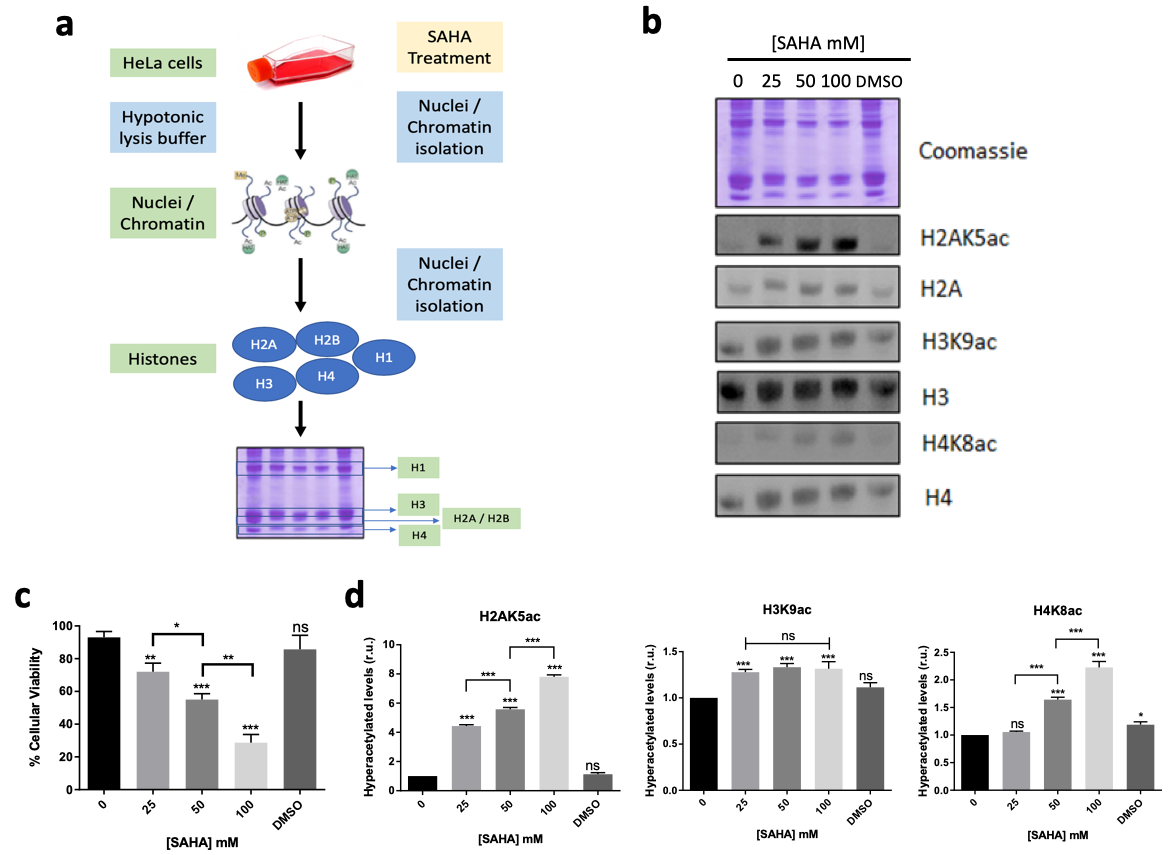
**

**Supplementary Figure 2.** Analysis of histone hyperacetylation with SAHA treatment. (A) Schematic procedure for histone hyperacetylation using SAHA treatment of HeLa cells. Histones were extracted with the acid extraction protocol by Shechter et al. (B) Analysis of histone hyperacetylation by Western blot (WB) using 15% SDS-PAGE. (C) Cell viability of SAHA-treated HeLa cells (D) Relative histone acetylation levels analyzed by WB using anti‐H2AK5ac, anti-H395ac and anti-H4K8ac. Pan-histone levels for H2A, H3 and H4 were used as normalizers in the densitometry of each specific band. Data are expressed as mean±SEM from three independent experiments. ns = non-significant p value; *p < 0.05; **p < 0.01; ***p < 0.001 versus histones 0 μg/ml. The lines at the top of columns indicate differences between compared conditions.


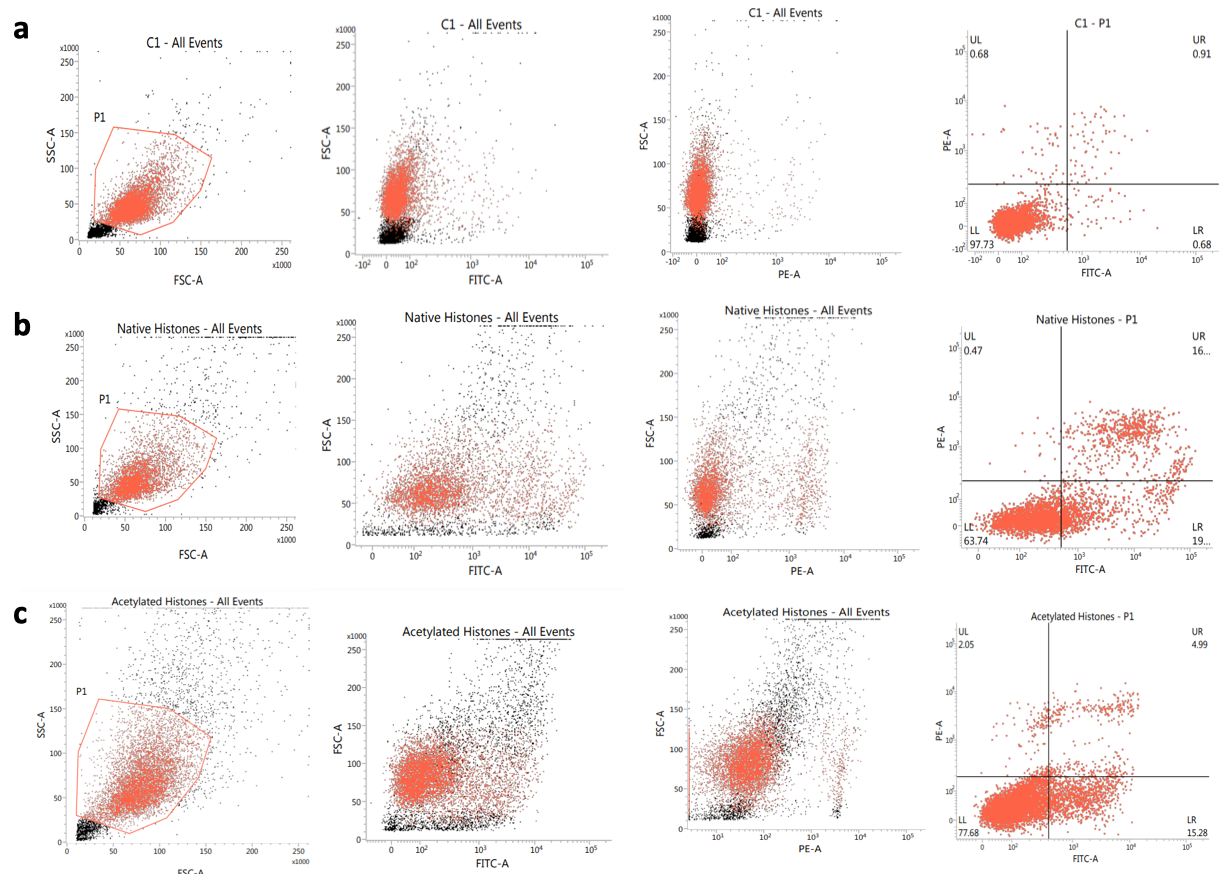


**Supplementary Figure 3.** Analysis of cellular viability in HUVEC presented by Flow Cytometry Charts. (A). Flow chart of HUVEC cultured without any treatment. (B). Flow chart of HUVEC cultured with 50 mg/mL of extracellular native histones during 4 hours. (C). Flow chart of HUVEC cultured with 50 mg/mL of extracellular hyperacetylated histones during 4 hours. Flow cytometry experiments consisted on the analysis of 10.000 cells.


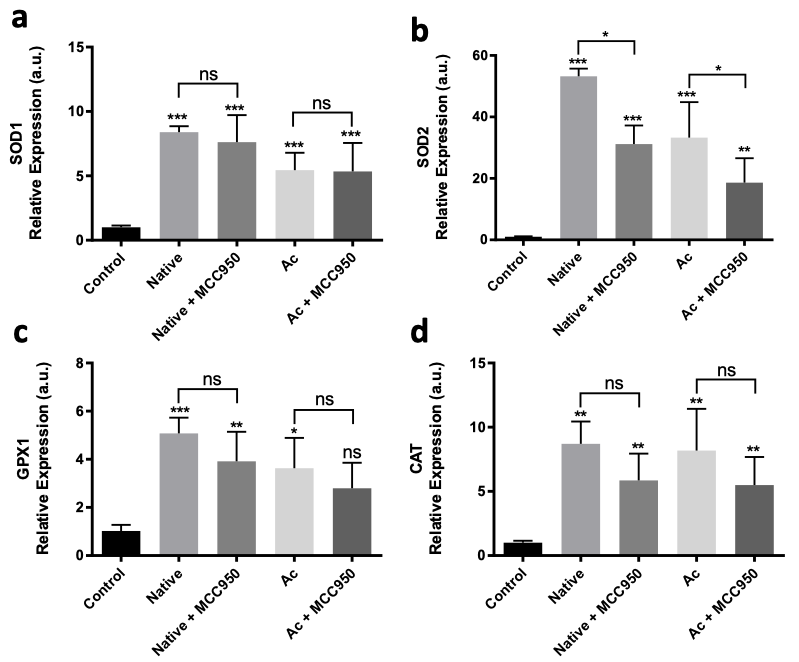


**Supplementary Figure 4.** Analysis of the effect of NLRP3 Inflammasome inhibition in antioxidant gene expression after a challenge with extracellular (native or hyperacetylated) histones. (A) *SOD1* gene expression (B) *SOD2* gene expression (C) *GPX1* gene expression and (D) *CAT* gene expression after the treatment with extracellular histones and MCC950. Data are expressed as mean ± SEM of triplicates from three independent experiments. *p < 0.05; **p < 0.01; ***p < 0.001 versus histones 0 μg/ml. Lines at the top of columns indicate differences between HUVEC cells treated with extracellular (native or hyperacetylated) histones and MCC950 inflammasome inhibitor.

**Supplementary Table 1**. Peptides selected for MRM-MS quantification.

| **Protein** | **Peptide** |
| --- | --- |
| Histone H2B | LLLPGELAK |
| Histone H3 | STELLIR |
| Histone H4 | Mean of: DNIQGITKPAIR and VFLENVIR |
